# Supplementary material
Source: Springer Nature journal article supplement (https://www.springermedizin.de/resource/supplementary/13756_2013_566_MOESM2_ESM.pdf/9682346)

# Community-associated methicillin-resistant *S aureus*

## Hospital-associated methicillin-resistant *S aureus*

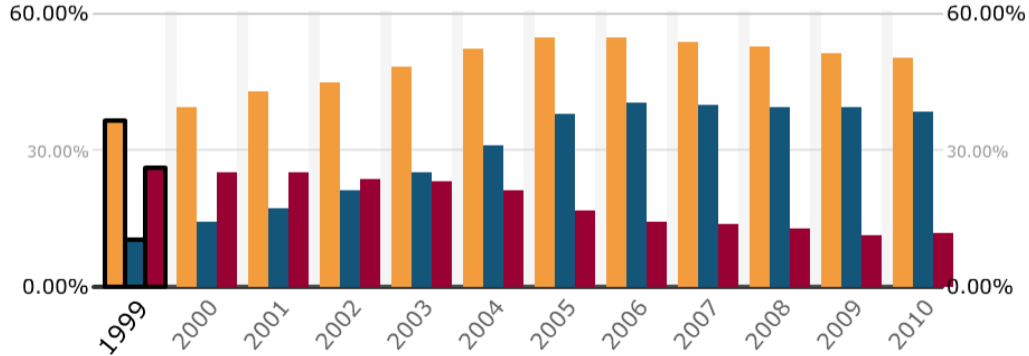

Supplement: MOESM2 [file 9682346]
